# Supplementary material for: The impact of the introduction of new recognition criteria for overwork-related cardiovascular and cerebrovascular diseases: a cross-country comparison
Source: PubMed Central journal article supplement (PMC5427845; doi:10.1038/s41598-017-00198-5), 2017-03-13
Supplement: 41598_2017_198_MOESM1_ESM.pdf [file 41598_2017_198_MOESM1_ESM.pdf]

## **Supplementary Information**

### **Title**

**The impact of the introduction of new recognition criteria for overwork-related cardiovascular and cerebrovascular diseases: a cross-country comparison**

### **Authors**

**Ro-Ting Lin\*, Cheng-Kuan Lin, David C. Christiani, Ichiro Kawachi, Yawen Cheng, Stéphane Verguet, Simcha Jong**

### **Corresponding author:**

Ro-Ting Lin

Takemi Fellow, Department of Global Health and Population, Harvard T.H. Chan School of Public Health

Postdoctoral Research Fellow, National Health Research Institutes, Taiwan

Assistant Professor, Department of Occupational Safety and Health, China Medical University, Taiwan

Email: [roting@ntu.edu.tw](mailto:roting@ntu.edu.tw)

Telephone: +886-4-22053366 ext. 6215

**Table S1. Age structure of the workforce in Taiwan and Japan before and after major changes in recognition criteria for overwork-related cardiovascular and cerebrovascular diseases (CVDs)**

| Characteristics                          | Taiwan          |        |                 |        | Japan           |        |                 |        |
|------------------------------------------|-----------------|--------|-----------------|--------|-----------------|--------|-----------------|--------|
|                                          | Before*         |        | After†          |        | Before*         |        | After†          |        |
| Number of male employees, by age group   | Mean (thousand) | %      | Mean (thousand) | %      | Mean (thousand) | %      | Mean (thousand) | %      |
| 25–34 years                              | 1596.60         | 29.12  | 1564.00         | 27.22  | 10332.00        | 24.86  | 10175.40        | 24.75  |
| 35–44 years                              | 1658.60         | 30.25  | 1634.80         | 28.45  | 9123.60         | 21.95  | 9352.40         | 22.75  |
| 45–54 years                              | 1472.20         | 26.85  | 1540.60         | 26.81  | 11004.80        | 26.48  | 9699.20         | 23.60  |
| 55–64 years                              | 621.40          | 11.33  | 846.80          | 14.74  | 7520.40         | 18.10  | 8232.20         | 20.03  |
| >64 years                                | 134.80          | 2.46   | 160.00          | 2.78   | 3578.40         | 8.61   | 3645.60         | 8.87   |
| Total                                    | 5483.60         | 100.00 | 5746.20         | 100.00 | 41559.20        | 100.00 | 41104.80        | 100.00 |
| Number of female employees, by age group | Mean (thousand) | %      | Mean (thousand) | %      | Mean (thousand) | %      | Mean (thousand) | %      |
| 25–34 years                              | 1429.00         | 35.61  | 1450.60         | 32.69  | 6491.40         | 23.64  | 6930.80         | 24.83  |
| 35–44 years                              | 1269.20         | 31.63  | 1354.80         | 30.53  | 6023.80         | 21.94  | 6278.80         | 22.49  |
| 45–54 years                              | 965.60          | 24.06  | 1116.20         | 25.16  | 7983.60         | 29.07  | 7170.00         | 25.69  |
| 55–64 years                              | 296.20          | 7.38   | 453.20          | 10.21  | 4801.20         | 17.48  | 5326.00         | 19.08  |
| >64 years                                | 53.00           | 1.32   | 62.20           | 1.40   | 2159.00         | 7.86   | 2207.20         | 7.91   |
| Total                                    | 4013.00         | 100.00 | 4437.00         | 100.00 | 27459.00        | 100.00 | 27912.80        | 100.00 |

\* Defined as 5 years before new criteria: 2006–2010 for Taiwan and 1997–2001 for Japan. † Defined as 5 years after new criteria: 2011–2015 for Taiwan and 2002–2006 for Japan.

**Table S2. Mortality rate for cardiovascular and cerebrovascular diseases (CVDs) in Taiwan and Japan**

| Year | Taiwan      |                    |                   |                                                                    | Japan       |                    |                   |                                                                    |
|------|-------------|--------------------|-------------------|--------------------------------------------------------------------|-------------|--------------------|-------------------|--------------------------------------------------------------------|
|      | Crude rate* | Age-standardized*† | Overwork-related* | Rate Ratio (Overwork-related CVD rate ÷ Age-standardized CVD rate) | Crude rate* | Age-standardized*† | Overwork-related* | Rate Ratio (Overwork-related CVD rate ÷ Age-standardized CVD rate) |
| 1990 | 144.21      | 210.69             | -                 | -                                                                  | 212.11      | 144.44             | -                 | -                                                                  |
| 1995 | 146.28      | 180.73             | -                 | -                                                                  | 221.49      | 125.14             | -                 | -                                                                  |
| 2000 | 143.43      | 149.98             | -                 | -                                                                  | 230.77      | 109.04             | 0.20              | 0.18%                                                              |
| 2005 | 146.98      | 125.70             | -                 | -                                                                  | 248.01      | 96.32              | 0.79              | 0.82%                                                              |
| 2010 | 151.01      | 106.51             | 0.57              | 0.53%                                                              | 276.37      | 87.67              | 0.67              | 0.76%                                                              |
| 2013 | 160.59      | 100.45             | 0.88              | 0.87%                                                              | 306.07      | 86.07              | 0.69              | 0.80%                                                              |

\* Unit: per 100,000 population. † Based on World Health Organization's new World Standard Population. <http://www.who.int/healthinfo/paper31.pdf>. Accessed 7 June 2016

Source of data: Institute for Health Metrics and Evaluation (IHME) (2015). GBD Compare. WA, United States. <http://vizhub.healthdata.org/gbd-compare>. Accessed 7 June 2016
